# Supplementary material
Source: publisher site journal article supplement (http://www.spandidos-publications.com/127/downloadSupplementary)

Figure S1. Efficiency of OPA1 knockdown using siRNA transfection was detected via western blot analysis. Three independent experiments were repeated.

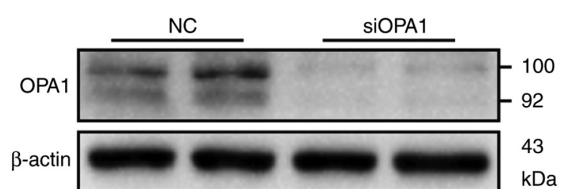

Supplement: Supplementary file 1 [file downloadSupplementary]
